# Supplementary material for: Quality, Coverage, and Communication Performance of Sepsis Short Videos Across Major Social Media Platforms: A Mixed-Methods Study
Source: Research Square preprint supplement (doi:10.21203/rs.3.rs-8332100/v1), 2026-01-24
Supplement: Supplementary file 1 [file e7bdf8da334208684c463ca1.xlsx]

## Sheet: Table 1
Characteristic		N=200
Sex (%)
	Female	100 (50.00)
	male	100 (50.00)
Age (%)
	18-44	121 (60.50)
	46-60	41 (20.50)
	61-80	38 (19.00)
Education (%)
	Higher	91 (45.50)
	Middle or below	78 (39.00)
	Postgraduate or above	31 (15.50)
Level of understanding (%)
	Completely unaware	93 (46.50)
	Minimal	64 (32.00)
	Basic	35 (17.50)
	Comprehensive	8 (4.00)
Platform (%)
	Bilibili	42 (21.00)
	Others	39 (19.50)
	Tiktok	75 (37.50)
	Wechat	44 (22.00)
Time (%)
	<1min	32 (16.00)
	1-3min	99 (49.50)
	3-5min	53 (26.50)
	>5min	16 (8.00)
Frequence (%)
	Rarely	26 (13.00)
	Occasionally	56 (28.00)
	Often	118 (59.00)

## Sheet: Table 2
	Non-physician		Physician		p value
like (median [IQR])	53.00 [8.00, 1061.50]		191.50 [60.50, 740.50]		0.04
save (median [IQR])	21.50 [8.00, 157.00]		66.50 [24.75, 270.50]		0.013
share (median [IQR])	24.50 [6.00, 104.75]		94.00 [25.00, 424.25]		0.001
comment (median [IQR])	5.00 [1.00, 71.00]		13.00 [2.00, 136.00]		0.153
CRR (median [IQR])	0.51 [0.16, 1.03]		0.39 [0.21, 0.60]		0.187
DI (median [IQR])	0.67 [0.15, 1.54]		0.63 [0.32, 1.10]		0.68
CLR (median [IQR])	0.08 [0.01, 0.25]		0.08 [0.03, 0.15]		0.474
	GQS≤3		GQS＞3		p value
like (median [IQR])	216.50 [22.75, 2625.25]		76.00 [13.00, 397.75]		0.022
save (median [IQR])	35.50 [12.75, 311.00]		40.50 [8.75, 168.25]		0.612
share (median [IQR])	40.50 [10.50, 509.50]		55.00 [13.00, 273.50]		0.681
comment (median [IQR])	13.00 [2.00, 235.75]		5.00 [0.00, 39.75]		0.019
CRR (median [IQR])	0.31 [0.11, 0.63]		0.47 [0.31, 1.00]		0.003
DI (median [IQR])	0.27 [0.08, 0.92]		0.90 [0.39, 1.53]		<0.001
CLR (median [IQR])	0.10 [0.02, 0.25]		0.07 [0.00, 0.16]		0.054
	DISCERN≤3		DISCERN＞3		p value
like (median [IQR])	131.00 [21.00, 2123.50]		106.00 [9.00, 421.00]		0.144
save (median [IQR])	34.00 [12.50, 215.00]		71.00 [8.00, 196.00]		0.817
share (median [IQR])	40.00 [11.00, 293.00]		84.00 [15.00, 293.00]		0.603
comment (median [IQR])	9.00 [1.00, 161.00]		7.00 [1.00, 42.00]		0.398
CRR (median [IQR])	0.35 [0.12, 0.65]		0.46 [0.37, 1.35]		0.001
DI (median [IQR])	0.40 [0.16, 1.30]		0.90 [0.50, 1.44]		0.006
CLR (median [IQR])	0.07 [0.01, 0.22]		0.08 [0.03, 0.19]		0.876
	Neutral titles		Clickbait-style titles		p value
like (median [IQR])	81.00 [12.00, 553.25]		246.00 [89.25, 2635.25]		0.019
save (median [IQR])	34.00 [8.75, 193.75]		84.00 [14.75, 370.50]		0.114
share (median [IQR])	40.00 [10.75, 273.50]		75.50 [33.00, 460.00]		0.089
comment (median [IQR])	6.00 [1.00, 74.75]		14.00 [2.75, 187.75]		0.099
CRR (median [IQR])	0.45 [0.17, 1.00]		0.45 [0.16, 0.82]		0.576
DI (median [IQR])	0.68 [0.26, 1.46]		0.43 [0.17, 1.01]		0.128
CLR (median [IQR])	0.08 [0.01, 0.20]		0.07 [0.01, 0.22]		0.875
	No background soundtrack	Intense	Soothing	Sentimental	p value
like (median [IQR])	99.50 [13.00, 427.25]	1116.50 [158.50, 5063.75]	85.00 [14.00, 388.00]	59.00 [11.00, 761.00]	0.018
save (median [IQR])	33.50 [9.00, 168.25]	164.50 [21.25, 515.25]	51.00 [8.50, 235.00]	15.00 [9.00, 131.50]	0.216
share (median [IQR])	40.00 [8.75, 239.50]	190.50 [40.75, 596.50]	40.00 [14.00, 125.00]	38.00 [6.50, 454.00]	0.26
comment (median [IQR])	8.50 [1.00, 85.75]	41.00 [4.75, 1057.00]	5.00 [0.50, 41.00]	7.00 [2.50, 157.50]	0.078
CRR (median [IQR])	0.43 [0.23, 0.98]	0.16 [0.07, 0.35]	0.59 [0.33, 1.00]	0.35 [0.13, 0.67]	0.002
DI (median [IQR])	0.69 [0.26, 1.54]	0.30 [0.09, 0.96]	0.67 [0.27, 1.40]	0.29 [0.14, 0.82]	0.215
CLR (median [IQR])	0.10 [0.02, 0.20]	0.07 [0.01, 0.23]	0.05 [0.01, 0.16]	0.17 [0.11, 0.27]	0.134

## Sheet: S1
Section	No.	Question	Response options
Basic Information	1	Sex	Male | Female
Basic Information	2	Age	Under 18 | 18–30 | 31–45 | 46–60 | Over 60
Basic Information	3	Highest education level	Middle school or below | High school / Secondary vocational | Junior college (Associate) | Bachelor’s | Postgraduate or above
Basic Information	4	Occupation	(Please specify) ________
Sepsis Awareness	5	Have you ever heard of “sepsis”?	Yes | No
Sepsis Awareness	6	If yes， how well do you understand sepsis?	In-depth understanding (know causes, symptoms, prevention and treatment) | Some understanding (know basic concepts/some symptoms) | Very little understanding | No understanding
Sepsis Awareness	7	How serious do you think sepsis is?	Very serious | Quite serious | Average | Not serious | Not sure
Sepsis Awareness	8	Have you ever consumed sepsis-related popular science/education content?	Follow often | Occasionally | Rarely | Never
Short-Video Habits & Preferences	9	Do you often obtain health information via short-video platforms?	Often | Occasionally | Rarely | Never
Short-Video Habits & Preferences	10	Which short-video platforms do you mainly use for information? (Multiple choice)	TikTok/Douyin | Kuaishou | Bilibili | Weishi | Other: ________
Short-Video Habits & Preferences	11	What types of popular-science short videos do you prefer? (Multiple choice)	Animated explanations | Expert narration | Case sharing | Live-action recording | Image–text combinations | Other: ________
Short-Video Habits & Preferences	12	What is your typical viewing duration per session?	< 1 minute | 1–3 minutes | 3–5 minutes | > 5 minutes
Attitudes & Expectations	13	Do you think sepsis popular-science content is currently insufficient in society?	Yes | No | Uncertain
Attitudes & Expectations	14	Do you wish to learn sepsis knowledge via short videos?	Very much | Yes | Neutral | No
Attitudes & Expectations	15	What do you mainly expect from sepsis popular-science short videos? (Multiple choice)	Clear and easy-to-understand disease introduction | Authoritative expert explanations | Real case sharing | Prevention and treatment advice | Latest research updates | Other: ________
Attitudes & Expectations	16	Which factors most enhance the credibility of sepsis popular-science short videos? (Multiple choice)	Clear and concise expression | Citing authoritative sources or expert opinions | Balanced and objective content | Providing more reference links | Clearly stating areas of uncertainty | Other: ________
Attitudes & Expectations	17	Select the two most important/interesting dimensions for sepsis short videos (select 2)	Definition |Symptoms |Risk Factors |Prevention |Evaluation/Treatment |Prognosis
Attitudes & Expectations	18	If you have watched sepsis popular-science short videos	how would you rate their overall quality?
Attitudes & Expectations	19	Would you share/recommend valuable sepsis popular-science short videos to family and friends?	Very willing | Willing | Neutral | Unwilling
Engagement Intentions	20	Would you save/favorite short videos you consider valuable and worth revisiting?	Very willing | Willing | Neutral | Unwilling
Engagement Intentions	21	In which situations do you usually like a short video? (Multiple choice)	To show that I like the video | To indicate basic approval of the content | The content inspired or helped me | Because I like it or find it useful, I may also favorite or share it
Engagement Intentions	22	In which situations do you usually comment on a short video? (Multiple choice)	The content is highly relevant to me / resonates with me | I have questions and want to consult or verify with the author/others | I want to express support or thanks | I want to present a different view / join a debate | The controversial or emotional content motivates me to comment
Open-ended	23	What are the main problems you see in current sepsis popular-science?	(Please briefly describe) ________
Open-ended	24	What improvements or innovations would you suggest for sepsis popular-science short videos?	(Please describe in detail) ________

## Sheet: S1(Chinese version of the surv)
第一部分：基本信息
1. 性别：
男
女
2. 年龄：
18岁以下
18-30岁
31-45岁
46-60岁
60岁以上
3. 受教育程度：
初中及以下
高中/中专
大专
本科
研究生及以上
4. 职业：
（请填写_________________________________）
第二部分：对脓毒症的认知情况
5. 您是否听说过“脓毒症”这一疾病？
是
否
6. 如果您听说过，请问您对脓毒症的了解程度如何？
了解得比较深入（知道病因、症状、预防及治疗措施等）
了解一些（知道部分基本概念和症状）
了解很少
不了解
7. 您认为脓毒症的危害性如何？
非常严重
较严重
一般
不严重
不清楚
8. 您曾经或正在接触过脓毒症相关的科普信息吗？
经常关注
偶尔关注
很少关注
从未关注
第三部分：短视频观看习惯与偏好
9. 您是否经常通过短视频平台获取健康科普信息？
经常
偶尔
很少
从不
10. 您主要使用哪些短视频平台获取信息？（可多选）
抖音/TikTok
快手
B站
微视
其他（请注明_________）
11. 您一般喜欢观看哪种类型的科普短视频？（可多选）
动画讲解
专家讲解
病例分享
实景拍摄
图文结合
其他（请注明_________）
12. 您每次观看短视频的时长通常是：
少于1分钟
1-3分钟
3-5分钟
超过5分钟
第四部分：对脓毒症科普短视频的态度与期望
13. 您是否认为目前社会上关于脓毒症的科普信息较少？
是
否
不确定
14. 您是否希望通过短视频这种形式了解脓毒症相关知识？
非常希望
希望
一般
不希望
15. 您对脓毒症科普短视频的主要期望包括哪些？（可多选）
清晰易懂的病症介绍
权威专家讲解
实际案例分享
预防和治疗建议
最新研究动态
其他（请注明_________）
16. 在您看来，以下哪些因素最能提升脓毒症科普短视频的可信度？（可多选）
明确、简洁的内容表达
引用权威资料或专家观点
内容平衡、客观无偏
提供更多参考资料链接
明确说明存在的不确定性
其他（请注明_________）
17.您认为在脓毒症科普短视频中最重要/最感兴趣的两个维度是？（限选2项）
脓毒症定义
脓毒症症状
脓毒症预防
脓毒症危险因素
脓毒症评估及治疗
脓毒症预后
18. 如果您观看了脓毒症科普短视频，您会如何评价其整体质量？（可按1-5分打分，1分最低，5分最高）
评分：____分
19. 您是否愿意分享并推荐您认为有价值的脓毒症科普短视频给家人和朋友？
非常愿意
愿意
一般
不愿意
20.您是否会收藏您认为有价值，值得反复观看的短视频？
非常愿意
愿意
一般
不愿意
21.你一般会在什么情况下对短视频进行点赞（多选）？
通常表明你对视频的喜欢
通常表明你对视频内容的基本认可
视频内容给了我启示或帮助
你可能会因为喜欢/内容有用而进行收藏、分享
22.你一般会在什么情况下对短视频进行评论（多选）？
内容与我强相关/引发共鸣
对内容有疑问，想向作者/他人求证或请教
想表达支持或感谢
想提出不同意见/参与讨论辩论
被争议性内容激发评论欲望
23. 您认为当前关于脓毒症的科普存在哪些主要问题？
（请简要说明______________________________________________）
24. 您对脓毒症科普短视频有哪些改进或创新的建议？
（请详细描述______________________________________________）

## Sheet: S2
Modified DISCERN Reliability Checklist (Scoring ranges from 0 to 5)
No.	Criterion
1	Is the video clear, concise, and easy to understand?
2	Are credible/valid sources cited?
3	Is the content balanced and free of bias?
4	Are additional information sources for patients listed?
5	Are areas of uncertainty acknowledged?
Scoring: Yes = 1 point; No = 0 points.

## Sheet: S3
Global Quality Score (GQS) (Scoring ranges from 1 to 5)
GQS Definition	Score
Poor quality：Specifically, the content is illogical, the mobility is poor, most of the information is missing, and it is useless for patients.	1
Generally poor quality：the content logic is poor, although some information is listed, more important information is still missing, and the use of patients is very limited.	2
Moderate quality：some important information is adequately discussed.	3
Good quality and flow：Specifically, the video logic is clear and smooth, covering most of the relevant information, which is useful for patients.	4
Excellent quality and flow：Specifically, the video logic is clear, and the content is very smooth, which is very useful for patients.	5

## Sheet: S4
Content Coverage by Dimension (n, %)
Video content level	Definition, n (%)	Symptoms, n (%)	Risk factors, n (%)	Evaluation, n (%)	Management, n (%)	Outcomes, n (%)
Not mentioned (0)
Minimal (0.5)
Partial (1)
Mostly covered (1.5)
Comprehensive (2)

## Sheet: S5
Platform	Likes		Comments		Shares		Favorites/Save
TikTok(Douyin)		first-level approval (initial endorsement) indicating viewers’ liking of the video		user-generated textual responses attached to the video		forwarded to contacts or feeds within/beyond the app		saved for later retrieval, indicating revisit intent
Bilibili		first-level approval (initial endorsement) indicating viewers’ liking of the video		discussion entries; danmaku are treated as comments		forwarded within Bilibili or to external platforms		added to a personal favorites list for later access
WeChat Channels		first-level approval (initial endorsement) indicating viewers’ liking of the video		user-generated textual responses attached to the video		forwarded to Chats, Moments, or other WeChat surfaces		saved for later retrieval, indicating revisit intent
	Definition equivalence	Metric role	Include?
Likes	Yes	Denominator for CRR/DI/CLR	Yes
Comments	Yes	Numerator for CLR	Yes
Shares	Yes	Numerator for DI	Yes
Favorites/Save	Yes	Numerator for CRR	Yes
Equivalence: Likes are treated as first-level approval; Favorites/Shares/Comments as second-level engagements. Bilibili danmaku are merged into Comments.
Exclusions: Platform-specific monetary actions (e.g., coins, gifts/tips)
Counting rule: One action per account per video; de-duplicated at video level.
Snapshot & timing: All counts captured at a single snapshot date; models adjust for video age and duration.
Terminology: “Favorites/Save/Bookmark” are treated as the same construct (retention intent)
WeChat scope: The mapping applies to WeChat Channels (short-video). Official Accounts (articles) are not mixed; if analyzed, reported separately

## Sheet: S6
platform	pair	ρ (Spearman)	p-value	n
tiktok	Likes vs Favorites	0.487436	0.000921303	50
tiktok	Likes vs Shares	0.399765	0.00321202	50
tiktok	Likes vs Comments	0.395209	0.00295748	50
bilibili	Likes vs Favorites	0.553925	0.000556016	50
bilibili	Likes vs Shares	0.667025	6.53464e-06	50
bilibili	Likes vs Comments	0.667798	6.31869e-06	50
wechat	Likes vs Favorites	0.543413	0.000896076	40
wechat	Likes vs Shares	0.670468	4.11702e-06	40
wechat	Likes vs Comments	0.478542	0.00237274	40
