# Supplementary material for: Quality, Coverage, and Communication Performance of Sepsis Short Videos Across Major Social Media Platforms: A Mixed-Methods Study
Source: Research Square preprint supplement (doi:10.21203/rs.3.rs-8332100/v1), 2026-01-24
Supplement: Supplementary file 2 [file ecb701db29fd24f90522d274.xlsx]

## Sheet: Sheet1
Section	No.	Question	Response options
Basic Information	1	Sex	Male | Female
Basic Information	2	Age	Under 18 | 18–30 | 31–45 | 46–60 | Over 60
Basic Information	3	Highest education level	Middle school or below | High school / Secondary vocational | Junior college (Associate) | Bachelor’s | Postgraduate or above
Basic Information	4	Occupation	(Please specify) ________
Sepsis Awareness	5	Have you ever heard of “sepsis”?	Yes | No
Sepsis Awareness	6	If yes， how well do you understand sepsis?	In-depth understanding (know causes, symptoms, prevention and treatment) | Some understanding (know basic concepts/some symptoms) | Very little understanding | No understanding
Sepsis Awareness	7	How serious do you think sepsis is?	Very serious | Quite serious | Average | Not serious | Not sure
Sepsis Awareness	8	Have you ever consumed sepsis-related popular science/education content?	Follow often | Occasionally | Rarely | Never
Short-Video Habits & Preferences	9	Do you often obtain health information via short-video platforms?	Often | Occasionally | Rarely | Never
Short-Video Habits & Preferences	10	Which short-video platforms do you mainly use for information? (Multiple choice)	TikTok/Douyin | Kuaishou | Bilibili | Weishi | Other: ________
Short-Video Habits & Preferences	11	What types of popular-science short videos do you prefer? (Multiple choice)	Animated explanations | Expert narration | Case sharing | Live-action recording | Image–text combinations | Other: ________
Short-Video Habits & Preferences	12	What is your typical viewing duration per session?	< 1 minute | 1–3 minutes | 3–5 minutes | > 5 minutes
Attitudes & Expectations	13	Do you think sepsis popular-science content is currently insufficient in society?	Yes | No | Uncertain
Attitudes & Expectations	14	Do you wish to learn sepsis knowledge via short videos?	Very much | Yes | Neutral | No
Attitudes & Expectations	15	What do you mainly expect from sepsis popular-science short videos? (Multiple choice)	Clear and easy-to-understand disease introduction | Authoritative expert explanations | Real case sharing | Prevention and treatment advice | Latest research updates | Other: ________
Attitudes & Expectations	16	Which factors most enhance the credibility of sepsis popular-science short videos? (Multiple choice)	Clear and concise expression | Citing authoritative sources or expert opinions | Balanced and objective content | Providing more reference links | Clearly stating areas of uncertainty | Other: ________
Attitudes & Expectations	17	Select the two most important/interesting dimensions for sepsis short videos (select 2)	Definition |Symptoms |Risk Factors |Prevention |Evaluation/Treatment |Prognosis
Attitudes & Expectations	18	If you have watched sepsis popular-science short videos	how would you rate their overall quality?
Attitudes & Expectations	19	Would you share/recommend valuable sepsis popular-science short videos to family and friends?	Very willing | Willing | Neutral | Unwilling
Engagement Intentions	20	Would you save/favorite short videos you consider valuable and worth revisiting?	Very willing | Willing | Neutral | Unwilling
Engagement Intentions	21	In which situations do you usually like a short video? (Multiple choice)	To show that I like the video | To indicate basic approval of the content | The content inspired or helped me | Because I like it or find it useful, I may also favorite or share it
Engagement Intentions	22	In which situations do you usually comment on a short video? (Multiple choice)	The content is highly relevant to me / resonates with me | I have questions and want to consult or verify with the author/others | I want to express support or thanks | I want to present a different view / join a debate | The controversial or emotional content motivates me to comment
Open-ended	23	What are the main problems you see in current sepsis popular-science?	(Please briefly describe) ________
Open-ended	24	What improvements or innovations would you suggest for sepsis popular-science short videos?	(Please describe in detail) ________
